# Supplementary material
Source: PubMed Central journal article supplement (PMC6395047)
Supplement: NIHMS984435-supplement-1.pdf [file NIHMS984435-supplement-1.pdf]

## Supplementary Materials.

Supplementary Table A. *Dependent variables by infant*

| Child<br>alias | Risk<br>group | Frequency of first<br>person pronouns |           | Frequency of<br>second person<br>pronouns |           | Relative frequency<br>of first person<br>pronouns |           | Relative frequency<br>of second person<br>pronouns |           | Frequency of<br>vocative uses of<br>names |           | Frequency of<br>pronoun<br>substitution uses<br>of names |           |
|----------------|---------------|---------------------------------------|-----------|-------------------------------------------|-----------|---------------------------------------------------|-----------|----------------------------------------------------|-----------|-------------------------------------------|-----------|----------------------------------------------------------|-----------|
|                |               | <i>Mean</i>                           | <i>SD</i> | <i>Mean</i>                               | <i>SD</i> | <i>Mean</i>                                       | <i>SD</i> | <i>Mean</i>                                        | <i>SD</i> | <i>Mean</i>                               | <i>SD</i> | <i>Mean</i>                                              | <i>SD</i> |
| Ard            | HR            | 3%                                    | 3%        | 25%                                       | 13%       | 51%                                               | 32%       | 85%                                                | 13%       | 30%                                       | 28%       | 61%                                                      | 39%       |
| Cal            | HR            | 10%                                   | 9%        | 24%                                       | 9%        | 100%                                              | 1%        | 73%                                                | 13%       | 63%                                       | 37%       | 18%                                                      | 31%       |
| Car            | HR            | 11%                                   | 5%        | 29%                                       | 13%       | 84%                                               | 19%       | 85%                                                | 9%        | 55%                                       | 43%       | 28%                                                      | 35%       |
| Eoi            | HR            | 3%                                    | 3%        | 15%                                       | 10%       | 68%                                               | 32%       | 62%                                                | 19%       | 35%                                       | 34%       | 41%                                                      | 29%       |
| Gav            | HR            | 6%                                    | 6%        | 20%                                       | 7%        | 57%                                               | 29%       | 78%                                                | 16%       | 60%                                       | 29%       | 11%                                                      | 19%       |
| Ois            | HR            | 6%                                    | 5%        | 23%                                       | 7%        | 43%                                               | 31%       | 69%                                                | 15%       | 13%                                       | 17%       | 56%                                                      | 32%       |
| Reb            | HR            | 11%                                   | 7%        | 35%                                       | 14%       | 93%                                               | 14%       | 91%                                                | 11%       | 71%                                       | 38%       | 0%                                                       | 0%        |
| Rut            | HR            | 3%                                    | 4%        | 10%                                       | 8%        | 42%                                               | 39%       | 64%                                                | 24%       | 42%                                       | 39%       | 22%                                                      | 33%       |
| Sai            | HR            | 3%                                    | 4%        | 13%                                       | 5%        | 59%                                               | 51%       | 63%                                                | 30%       | 36%                                       | 34%       | 21%                                                      | 31%       |
| Bre            | LR            | 8%                                    | 5%        | 39%                                       | 15%       | 71%                                               | 28%       | 92%                                                | 12%       | 26%                                       | 24%       | 44%                                                      | 30%       |
| Cya            | LR            | 10%                                   | 5%        | 26%                                       | 15%       | 68%                                               | 33%       | 93%                                                | 12%       | 6%                                        | 14%       | 69%                                                      | 42%       |
| Eri            | LR            | 6%                                    | 4%        | 22%                                       | 11%       | 77%                                               | 24%       | 91%                                                | 10%       | 38%                                       | 32%       | 28%                                                      | 44%       |
| Haz            | LR            | 12%                                   | 6%        | 38%                                       | 17%       | 98%                                               | 4%        | 94%                                                | 11%       | 38%                                       | 48%       | 25%                                                      | 50%       |
| Lar            | LR            | 7%                                    | 5%        | 20%                                       | 6%        | 74%                                               | 31%       | 88%                                                | 12%       | 10%                                       | 23%       | 71%                                                      | 39%       |
| Nia            | LR            | 11%                                   | 5%        | 26%                                       | 7%        | 79%                                               | 15%       | 89%                                                | 11%       | 21%                                       | 26%       | 34%                                                      | 39%       |
| Rhi            | LR            | 8%                                    | 6%        | 28%                                       | 13%       | 63%                                               | 36%       | 87%                                                | 13%       | 18%                                       | 33%       | 33%                                                      | 47%       |
| Rub            | LR            | 5%                                    | 4%        | 22%                                       | 12%       | 79%                                               | 24%       | 73%                                                | 17%       | 26%                                       | 26%       | 38%                                                      | 38%       |
| Tho            | LR            | 8%                                    | 5%        | 40%                                       | 16%       | 55%                                               | 21%       | 85%                                                | 14%       | 3%                                        | 6%        | 29%                                                      | 34%       |

Supplementary Table B. *Number of utterances that contain a pronoun and/or a kin-term/name*

| Child<br>alias | Risk<br>group | No. of<br>transcripts | No. of utterances<br>containing first<br>person pronoun |           | No. of utterances<br>containing names for<br>mother |           | No. of utterances<br>containing second<br>person pronoun |           | No. of utterances<br>containing names for<br>child |           |
|----------------|---------------|-----------------------|---------------------------------------------------------|-----------|-----------------------------------------------------|-----------|----------------------------------------------------------|-----------|----------------------------------------------------|-----------|
|                |               |                       | <i>Mean</i>                                             | <i>SD</i> | <i>Mean</i>                                         | <i>SD</i> | <i>Mean</i>                                              | <i>SD</i> | <i>Mean</i>                                        | <i>SD</i> |
|                |               |                       | Ard                                                     | HR        | 13                                                  | 2.69      | 2.36                                                     | 3.92      | 5.36                                               | 16.00     |
| Bre            | HR            | 11                    | 8.55                                                    | 7.33      | 0.09                                                | 0.30      | 21.27                                                    | 9.81      | 7.73                                               | 4.20      |
| Cal            | HR            | 11                    | 8.45                                                    | 2.30      | 1.91                                                | 2.95      | 24.27                                                    | 9.62      | 4.09                                               | 2.39      |
| Car            | HR            | 11                    | 3.09                                                    | 3.27      | 2.00                                                | 2.37      | 12.09                                                    | 8.96      | 6.45                                               | 4.03      |
| Cya            | HR            | 8                     | 3.88                                                    | 3.27      | 2.00                                                | 0.93      | 12.00                                                    | 4.50      | 4.00                                               | 3.63      |
| Eoi            | HR            | 9                     | 5.11                                                    | 4.46      | 5.56                                                | 3.47      | 16.22                                                    | 4.92      | 8.33                                               | 4.69      |
| Eri            | HR            | 12                    | 8.58                                                    | 4.44      | 1.17                                                | 2.62      | 24.83                                                    | 7.35      | 3.17                                               | 3.33      |
| Gav            | HR            | 11                    | 2.13                                                    | 2.90      | 1.38                                                | 1.41      | 7.50                                                     | 6.48      | 4.50                                               | 4.96      |
| Haz            | HR            | 8                     | 1.82                                                    | 2.27      | 1.18                                                | 1.66      | 6.73                                                     | 2.72      | 6.55                                               | 7.22      |
| Lar            | HR            | 11                    | 2.69                                                    | 2.36      | 3.92                                                | 5.36      | 16.00                                                    | 8.75      | 3.54                                               | 3.62      |
| Nla            | LR            | 11                    | 8.27                                                    | 4.71      | 5.18                                                | 7.15      | 38.00                                                    | 15.11     | 3.27                                               | 3.90      |
| Ois            | LR            | 11                    | 8.73                                                    | 4.80      | 5.55                                                | 6.25      | 21.18                                                    | 11.63     | 2.27                                               | 3.69      |
| Reb            | LR            | 11                    | 4.55                                                    | 2.66      | 2.09                                                | 2.59      | 14.18                                                    | 6.13      | 1.91                                               | 2.43      |
| Rhi            | LR            | 10                    | 5.90                                                    | 4.95      | 0.30                                                | 0.67      | 18.40                                                    | 11.72     | 1.00                                               | 1.49      |
| Rub            | LR            | 11                    | 5.82                                                    | 4.09      | 1.45                                                | 1.75      | 15.55                                                    | 4.80      | 2.27                                               | 2.37      |
| Rut            | LR            | 11                    | 9.55                                                    | 4.97      | 2.27                                                | 1.56      | 22.00                                                    | 6.91      | 3.00                                               | 2.45      |
| Sai            | LR            | 11                    | 4.36                                                    | 3.14      | 2.64                                                | 3.20      | 14.18                                                    | 6.40      | 1.82                                               | 1.66      |
| Tho            | LR            | 11                    | 4.55                                                    | 2.98      | 6.82                                                | 5.86      | 18.18                                                    | 7.32      | 3.00                                               | 2.86      |
